# Supplementary material for: Online Psychosis Screening: Characterizing an Underexamined Population to Improve Access and Equity
Source: Atypon-hosted journal article supplement (doi:10.1176/appi.ps.202100257), 2022-02-17
Supplement: appi.ps.202100257.ds001.pdf [file appi.ps.202100257.ds001.pdf]

**Supplementary Table 1: Item-level comparison of what items were endorsed as distressing by respondents who did and did not identify as LGBTQ**

| Items                                                                              | LGBTQ<br>n=21,877 |       | Not LGBTQ<br>n=99,059 |       | $\chi^2$ | P     |
|------------------------------------------------------------------------------------|-------------------|-------|-----------------------|-------|----------|-------|
|                                                                                    | n                 | %     | N                     | %     |          |       |
| Q1: Familiar Surroundings seem strange                                             | 11,054            | 50.5% | 35,865                | 36.2% | 1500     | <.001 |
| Q2: Heard unusual sounds                                                           | 8,418             | 38.5% | 26,789                | 27.0% | 1100     | <.001 |
| Q3: Things appear different from usual                                             | 5,239             | 24.0% | 17,796                | 20.0% | 415.9    | <.001 |
| Q4: Experiences with telepathy, psychic forces or fortune telling                  | 2,488             | 11.4% | 9,366                 | 9.5%  | 75.5     | <.001 |
| Q5: Felt not in control of ideas or thoughts                                       | 12,267            | 56.1% | 44,802                | 45.2% | 845.7    | <.001 |
| Q6: Difficulty in getting point across because you ramble or go off track          | 11,431            | 52.3% | 41,574                | 41.9% | 769.5    | <.001 |
| Q7: Strong beliefs about being unusually gifted or talented                        | 3,316             | 15.2% | 14,121                | 14.3% | 11.8     | <.001 |
| Q8: Feel that other people are watching you or talking about you                   | 15,357            | 70.2% | 55,984                | 56.5% | 1400     | <.001 |
| Q9: Strange feelings below the skin (e.g. Bugs crawling)                           | 8,702             | 39.8% | 25,845                | 26.1% | 1600     | <.001 |
| Q10: Feel suddenly distracted by distant sounds that you are not normally aware of | 7,843             | 35.9% | 24,992                | 25.2% | 1000     | <.001 |
| Q11: Sense some force around you, although you couldn't see them                   | 11,356            | 39.0% | 35,842                | 36.2% | 1900     | <.001 |
| Q12: Do you worry that something may be wrong with your mind                       | 17,462            | 79.8% | 69,483                | 70.1% | 830      | <.001 |
| Q13: Have you felt like you or the world doesn't exist, or that you are dead       | 9,551             | 43.7% | 26,628                | 26.9% | 2400     | <.001 |
| Q14: Confused whether something is real or imaginary                               | 11,769            | 53.8% | 38,059                | 38.4% | 1700     | <.001 |
| Q15: Hold beliefs others would find unusual or bizarre                             | 5,403             | 24.7% | 20,949                | 21.2% | 132.5    | <.001 |
| Q16: Feel body has changed, or working differently                                 | 3,814             | 17.4% | 15,679                | 15.8% | 34.2     | <.001 |
| Q17: Are your thoughts so strong you can almost hear them                          | 8,309             | 38.0% | 28,570                | 28.8% | 706.1    | <.001 |
| Q18: Do you feel mistrustful or suspicious of people                               | 12,439            | 56.9% | 49,683                | 50.2% | 322.4    | <.001 |
| Q19: Have you seen unusual things like flashes, flames or figures                  | 4,900             | 22.4% | 15,442                | 15.6% | 593.8    | <.001 |
| Q20: Have you seen things others don't seem to see                                 | 5,419             | 24.8% | 15,725                | 15.9% | 983      | <.001 |
| Q21: Do people find it hard to understand what you are saying                      | 8,803             | 40.2% | 32,274                | 32.6% | 468.5    | <.001 |

## Supplementary Material 2: The 2017 Online Sociodemographic Survey

[Each included a dropdown list where respondents could select one value, unless otherwise stated]

### Gender

- Male
- Female

### Race/Ethnicity

- Asian or Pacific Islander
- Black or African American (non-Hispanic)
- Hispanic or Latino
- More than one of the above
- Native American or American Indian
- Other
- White (non-Hispanic)

### Age

- 11-17
- 18-24
- 25-34
- 35-44
- 45-54
- 55-64
- 65+

Which of the following populations describes you? Check all that apply.

- Veteran or active duty military
- Caregiver of someone living with emotional or physical illness
- LGBT
- Student
- New or expecting mother

### Household Income

- Less than \$20,000
- \$20,000 - \$39,999
- \$40,000 - \$59,999
- \$60,000 - \$79,999
- \$80,000 - \$99,999
- \$100,000 - \$149,999
- \$150,000+

Are you currently, or have you ever been, diagnosed with a mental health condition or addiction by a professional?

- Yes
- No

Do you have any of the following general health conditions? Check all that apply.

- Heart disease
- Diabetes
- Alzheimer's or other dementias
- Cancer
- Arthritis or other chronic pain
- COPD or other lung conditions
- Movement Disorders (involuntary tics, tardive dyskinesia)
- Other (please specify)

How can [REDACTED] help you? Check all that apply.

- A phone number to get immediate support or guidance
- Additional information about mental health
- Referrals to a local MHA affiliates or other organizations that can help
- Worksheets or coping skills to use at home
- An online or mobile program or app that can help you track or manage your symptoms
- Other (please specify)

What next steps do you plan to take after screening?

- Discuss the results with a family member, a friend or a professional
- Find additional information online
- Find treatment
- Monitor my health by taking screens regularly
- None at this time
